# Supplementary material
Source: PubMed Central journal article supplement (PMC3712501)
Supplement: NIHMS493536-supplement-ESI.pdf [file NIHMS493536-supplement-ESI.pdf]

## SUPPORTING INFORMATION

### **A Novel Class of Polymeric pH-Responsive MRI CEST Agents**

Shanrong Zhang,<sup>a,b</sup> Kejin Zhou,<sup>a</sup> Gang Huang,<sup>a</sup> Masaya Takahashi,<sup>b</sup> A. Dean Sherry<sup>\*,b,c</sup>  
and Jinming Gao<sup>\*,a,c</sup>

<sup>a</sup> Department of Pharmacology, Harold C. Simmons Comprehensive Cancer Center,  
University of Texas Southwestern Medical Center, Dallas, Texas 75390, USA

<sup>b</sup> Advanced Imaging Research Center, University of Texas Southwestern Medical Center,  
Dallas, Texas 75390, USA

<sup>c</sup> Department of Chemistry, University of Texas at Dallas, Richardson, Texas 75083,  
USA

\* To whom correspondence should be addressed:

[dean.sherry@utsouthwestern.edu](mailto:dean.sherry@utsouthwestern.edu) or [jinming.gao@utsouthwestern.edu](mailto:jinming.gao@utsouthwestern.edu)

## Table of Contents

| Items                                                                                                                                                                                                                      | Page # |
|----------------------------------------------------------------------------------------------------------------------------------------------------------------------------------------------------------------------------|--------|
| <b>1) Materials</b>                                                                                                                                                                                                        | 3      |
| <b>2) Synthesis of PEG-<i>b</i>-PDPA block copolymer</b>                                                                                                                                                                   | 3      |
| <b>3) Preparation of the micelle solutions for CEST evaluation</b>                                                                                                                                                         | 3      |
| <b>4) pH titration</b>                                                                                                                                                                                                     | 4      |
| <b>5) CMC measurements</b>                                                                                                                                                                                                 | 4      |
| <b>6) Preparation of samples for DLS and pH measurements</b>                                                                                                                                                               | 4      |
| <b>7) DLS protocols</b>                                                                                                                                                                                                    | 4      |
| <b>8) NMR CEST characterization</b>                                                                                                                                                                                        | 4      |
| <b>9) MRI protocols</b>                                                                                                                                                                                                    | 5      |
| <b>10) CEST spectral fitting method</b>                                                                                                                                                                                    | 5      |
| <b>Table S1.</b> The parameters for fitting the CEST spectrum of PEG <sub>114</sub> - <i>b</i> -PDPA <sub>116</sub> at pH 5.0 presented in Fig. 2a of the main text.                                                       | 6      |
| <b>Figure S1.</b> 500 MHz <sup>1</sup> H NMR Spectrum of PEG <sub>114</sub> - <i>b</i> -PDPA <sub>116</sub> in CDCl <sub>3</sub> .                                                                                         | 7      |
| <b>Figure S2.</b> The potentiometric titration curve and the corresponding differentiate curve of 88 mg PEG <sub>114</sub> - <i>b</i> -PDPA <sub>116</sub> with 0.02 M NaOH aqueous solution.                              | 8      |
| <b>Figure S3.</b> A plot of I <sub>1</sub> /I <sub>3</sub> values vs. the concentrations for PEG <sub>114</sub> - <i>b</i> -PDPA <sub>116</sub> .                                                                          | 9      |
| <b>Figure S4.</b> The CEST spectra of pure buffers: a) 0.1 M MES at pH 5.3 and b) 0.1 M MOPS at pH 7.5, respectively.                                                                                                      | 10     |
| <b>Figure S5.</b> The CEST spectra of small analog molecules: a) 116 mM N,N- diisopropylethylamine (DIPEA) in 0.1 M MES at pH 5.3 and b) 116 mM N,N-diisopropylaminoethanol (DIPAE) in 0.1 M MOPS at pH 5.8, respectively. | 11     |
| <b>Figure S6.</b> The CEST spectra of PEG <sub>114</sub> - <i>b</i> -PDPA <sub>116</sub> in 0.1 M MES and/or MOPS at the different pH values as labeled in the figures.                                                    | 12     |
| <b>10) References</b>                                                                                                                                                                                                      | 13     |

### 1) **Materials**

N,N,N',N'',N'''-Pentamethyldiethylenetriamine (PMDETA) was purchased from Sigma-Aldrich. 2-(Diisopropyl amino) ethyl methacrylate (DPA) was purchased from Polyscience Company. PEG macroinitiator (MeO-PEG<sub>114</sub>-Br) were prepared according to the procedure in literature.<sup>1</sup> Other solvents and reagents were used as received from either Sigma-Aldrich or Fisher Scientific Inc.

### 2) **Synthesis of PEG-*b*-PDPA block copolymer**

The PEG-*b*-PDPA block copolymer was synthesized by the atom transfer radical polymerization (ATRP) method. First, DPA (2.6 g, 120 mmol), PMDETA (25  $\mu$ L, 0.12 mmol), and MeO-PEG<sub>114</sub>-Br (500 mg, 0.1 mmol) were charged into a polymerization tube. Then DMF (1 ml) was added to dissolve the monomer and initiator. After three cycles of freeze-pump-thaw to remove oxygen, CuBr (16 mg, 0.11 mmol) was added into the reaction tube under nitrogen atmosphere, and the tube was sealed *in vacuo*. The polymerization was carried out at 50 °C for 16 hours. After polymerization, the reaction mixture was diluted with 20 ml THF, and passed through an Al<sub>2</sub>O<sub>3</sub> column to remove the catalyst. The THF solvent was removed by rotovap. The residue was dialyzed against the distilled water and lyophilized to provide a white powder. The resulting PEG-*b*-PDPA block copolymers were characterized by <sup>1</sup>H 500 MHz NMR, gel permeation chromatography (Viscotek GPCmax, PLgel 5  $\mu$ m MIXED-D columns by Polymer Labs, THF as eluent at 1 ml/min).

### 3) **Preparation of the micelle solutions for CEST evaluation**

Micelles were prepared similar to that of the published procedures.<sup>2</sup> First, 100 mg of the copolymer was dissolved in 5 ml DMF and then added into 40 ml distilled water dropwise under sonication. The mixture was diluted with DI water so that DMF percentage was around 1% (V/V). The DMF was removed through ultrafiltration dialysis with (10 kD) membrane for several times. Then the distilled water was added to adjust the polymer concentration to 15 mg/ml as a stock solution. After micelle formation, the nanoparticles were re-dispersed into 0.1 M MES / MOPS at different pH values and characterized using a 400 MHz NMR spectrometer for CEST efficiencies.

### 4) **pH titration**

First, PEG<sub>114</sub>-*b*-PDPA<sub>116</sub> copolymer (88 mg) was dissolved in 5 ml 0.1 mol/L HCl and diluted to 20 ml with DI water. The pH titration was carried out by adding the titrant (0.1 - 1 ml increments) of 0.02 M NaOH solution under vigorous magnetic stirring. The pH increase in the range of 2 to 10 was monitored as a function of

the total added volume of NaOH ( $V_{\text{NaOH}}$ ). The pH values were measured using a Mettler Toledo pH meter with a microelectrode.

### 5) **CMC measurements**

Critical micelle concentration (CMC) value is the threshold polymer concentration at which micelles would form in solution. CMC of PEG<sub>114</sub>-*b*-PDPA<sub>116</sub> copolymer was measured in the 0.2 M sodium phosphate buffer at pH 7.4. First, the stock solution (5 mg/ml) was diluted to different concentrations with the same buffer. In each solution, 5  $\mu\text{L}$  pyrene in THF solution ( $2 \times 10^{-4}$  M) was added to 2 ml polymer solution to produce the final pyrene concentration at  $5 \times 10^{-7}$  M. The fluorescence spectra were recorded on a Hitachi fluorometer (F-7500 model) with the excitation wavelength of 339 nm and the excitation and emission slits at 10.0 nm and 1.0 nm, respectively. The  $I_1$  and  $I_3$  values were measured as the maximum emission intensity at *ca.* 372 and 382 nm, respectively.  $I_1/I_3$  ratio was plotted as a function of polymer concentration.  $I_1/I_3$  ratio reflects the polarity of the pyrene environment where partition of pyrene in the hydrophobic micelle core leads to decreased  $I_1/I_3$  values.

### 6) **Preparation of samples for DLS and pH measurements**

PEG<sub>114</sub>-*b*-PDPA<sub>116</sub> (125 mg) was dissolved in 50 ml DI water by adding 2 ml 1M HCl. After fully dissolved, the total volume was adjusted to 100 ml by adding DI water. The initial pH is measured,  $\text{pH}_{(\text{initial})} = 1.4$ . This solution was titrated by adding the titrant (0.1 – 1 ml increments) of 0.02 M NaOH solution under vigorous magnetic stirring. At pH values of interest, the 1.5 ml mixtures were taken and filtrated through 0.45  $\mu\text{m}$  syringe filters. These samples were used to measure the hydrodynamic diameters and Zeta potentials.

### 7) **DLS protocols**

Dynamic light scattering (DLS) was measured on a Zetasizer  $\mu\text{V}$  model (with He-Ne laser,  $\lambda = 632$  nm) (Malvern Instruments Ltd, Worcestershire, UK). For hydrodynamic diameter measurement, Zen0040 disposable micro cuvettes were used as the sample cell, with 173° backscatter (NIBS default), number of runs = 5, duration time = 10 s, six measurements per data point, and automatic attenuation. For the Zeta potential measurement, DTS1060C Clear Disposable zeta cell was used as the sample cell, with automatic measurement duration (minimum 30 and maximum 100), automatic attenuation, and six measurements per sample.

### 8) **NMR CEST characterization**

<sup>1</sup>H NMR CEST evaluation was performed with an Agilent Technologies 9.4 T vertical bore NMR spectrometer (formerly Varian, Inc.) at the room temperature (around 20 °C inside the bore). A presat pulse sequence was used to collect CEST spectra with a 5 s square-shape hard pre-saturation pulse at a power level of 25 db

(equivalent to  $B_1 = 9.4 \mu\text{T}$ ) and the arrayed saturation frequency offset from +8,000 Hz to -8,000 Hz, and a step of -100 Hz (namely, 161 spectra in total were acquired in order to obtain a CEST spectrum).

For CEST dependence on concentration (Fig. 2d), a much shorter saturation duration time of 3 s was used. Other parameters were same as stated above.

**9) MRI protocols**

MRI CEST images were recorded with an Agilent Technologies 9.4 T / 31 cm bore-hole small animal MRI system (formerly Varian, Inc.) with a 38 mm quad coil (Doty Scientific, Inc.) as both excitation and receiver device. The temperature inside the magnet bore was around 20 °C. A customer modified fast spin echo (fsems) pulse sequence was used to acquire MRI raw images. The key modification was that a 3 s hard pre-saturation pulse at power level of 36 db (equivalent to  $B_1 = 8.2 \mu\text{T}$ ) was applied at different saturation frequency offsets, varying from +10 ppm to -10 ppm with a decreased step of 0.2 ppm. Other major parameters are: the repetition time  $TR = 3.15$  s,  $ETL = 8$ ,  $ESP = 4$ ,  $kzero = 4$ , the effective echo time  $TE_{\text{eff}} = 48$  ms, 1 average, 2 dummy scans, the matrix size of 128x128, the field of view (FOV) = 30 x 30 mm and the slice thickness of 1 mm.

**10) CEST spectral fitting method**

The CEST spectra were fitted to a 2-pool or 3-pool chemical exchange model of Block Equations using the Matlab platform (version 7.0, Mathworks, Natick, MA) by following the published procedures.<sup>3</sup>

**Tables S1.** The parameters for fitting the CEST spectrum of PEG<sub>114</sub>-*b*-PDPA<sub>116</sub> at pH 5.0 presented in **Fig. 2a** of the main text.<sup>a)</sup>

| $\tau_{\text{exNH}}$<br>( $\mu\text{s}$ ) | $B_1$<br>(Hz) | $\Delta\delta$<br>(ppm) | $T_1\text{Water}$<br>(s) | $T_2\text{Water}$<br>(s) | $T_1\text{NH}$<br>(s) | $T_2\text{NH}$<br>(s) |
|-------------------------------------------|---------------|-------------------------|--------------------------|--------------------------|-----------------------|-----------------------|
| 890                                       | 400           | 3.90                    | 3.00                     | 1.31                     | 1.11                  | 0.002                 |

a) The parameters listed in this Table:

- $\tau_{\text{exNH}}$ :** the lifetime of proton on the tertiary amines of block copolymer (in unit of micro-second)
- $B_1$ :** the power of the pre-saturation pulse (in unit of Hz)
- $\Delta\delta$ :** the chemical shift difference between the proton of tertiary amines of block copolymer and the bulk water (in unit of ppm)
- $T_1$  or  $T_2$  values:** the corresponding longitudinal or transversal relaxation times (in unit of second)

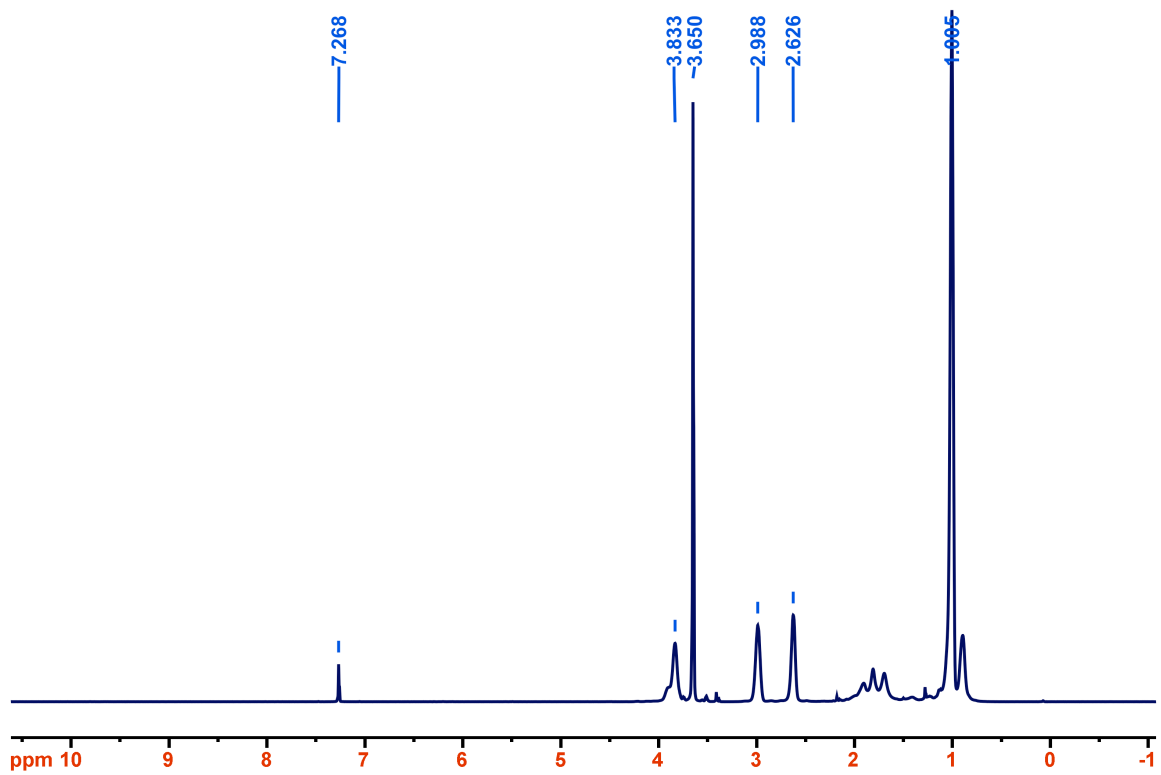

**Figure S1.** <sup>1</sup>H NMR spectrum of PEG<sub>114</sub>-*b*-PDPA<sub>116</sub> in CDCl<sub>3</sub>. The spectrum was recorded using a Varian 500 MHz NMR spectrometer.

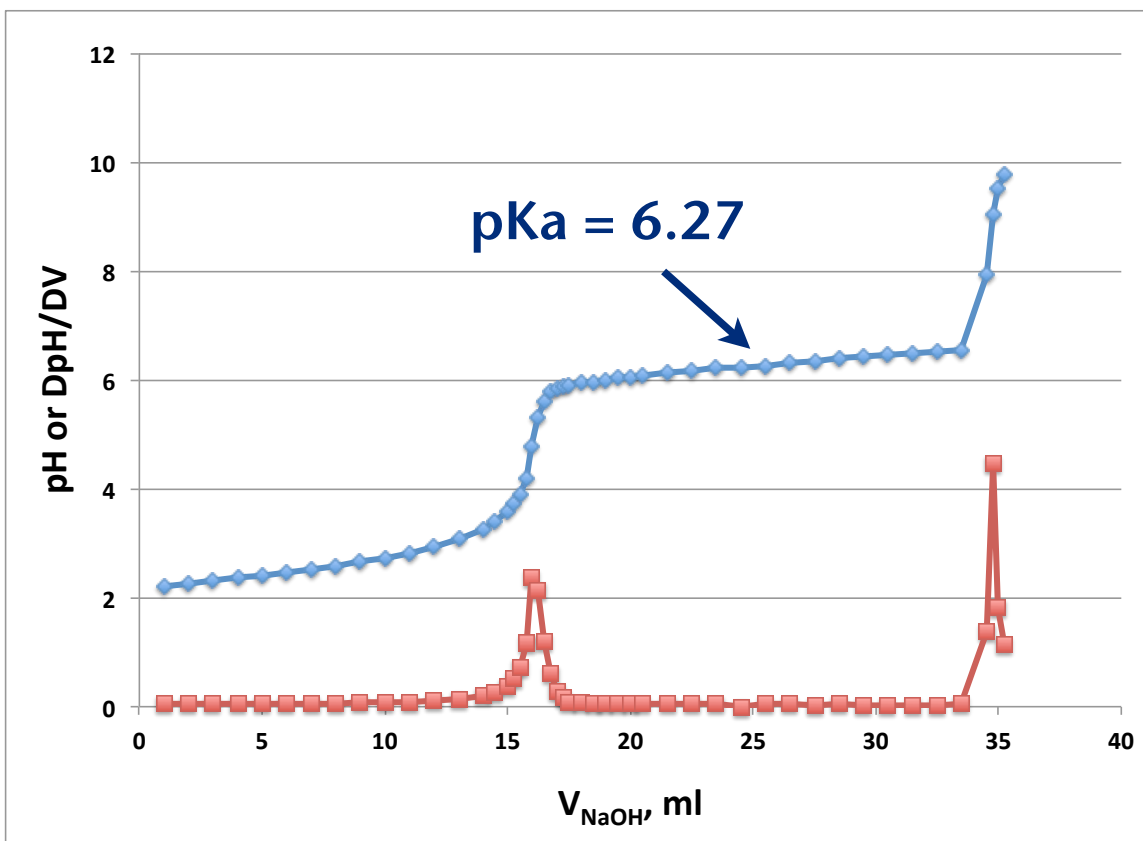

**Figure S2.** pH titration curve and the corresponding differential curve of 88 mg PEG<sub>114</sub>-*b*-PDPA<sub>116</sub> with 0.02 M NaOH aqueous solution.



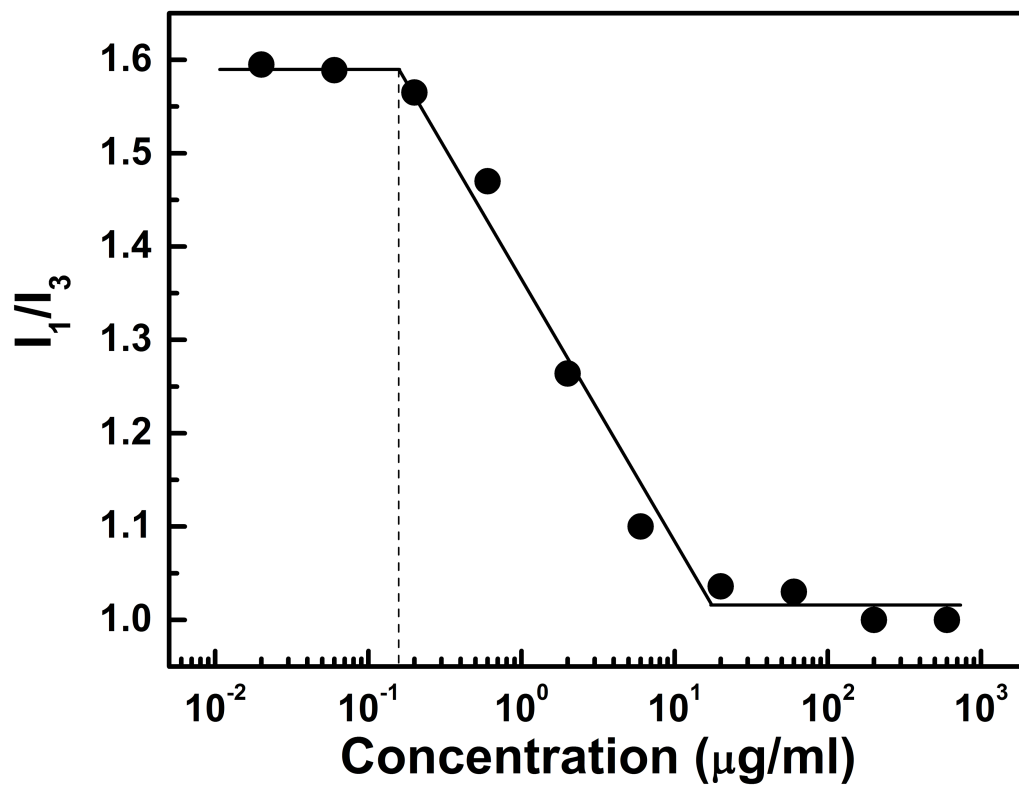

**Figure S3.** A plot of  $I_1/I_3$  values vs. the concentrations for  $\text{PEG}_{114}\text{-}b\text{-PDPA}_{116}$ , which yielded a CMC of 0.15  $\mu\text{g/ml}$ .

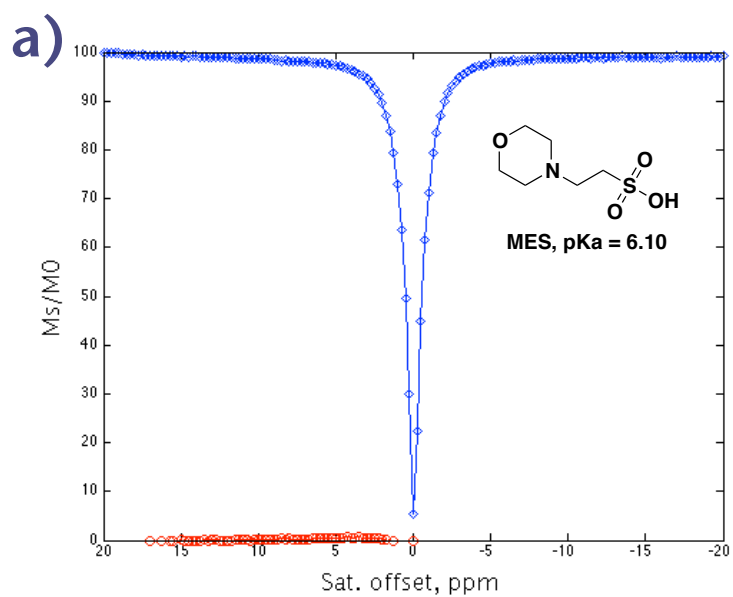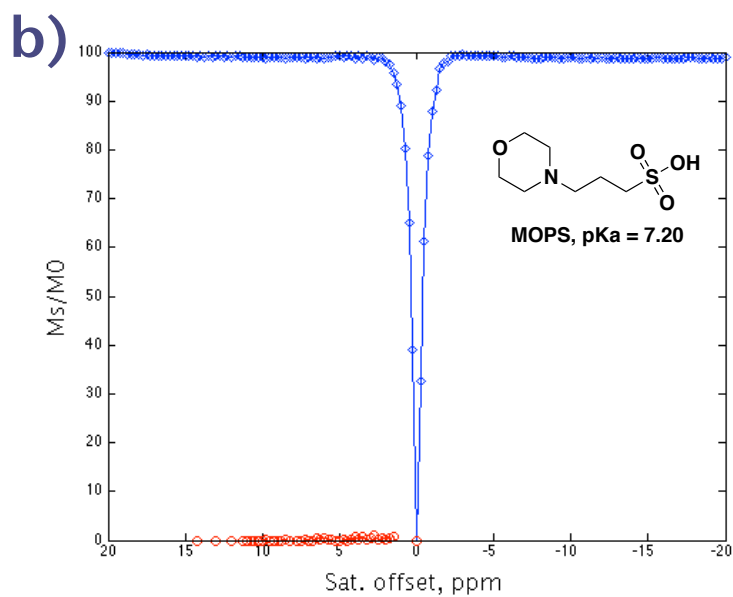

**Figure S4.** The CEST spectra of pure buffers: a) 0.1 M MES at pH 5.3 and b) 0.1 M MOPS at pH 7.5, respectively. The CEST asymmetries were also presented to better visualize the CEST effects (namely,  $\text{CEST}_{\text{asym}} = [M_s/M_0]_{\text{downfield}} - [M_s/M_0]_{\text{upfield}}$ ).

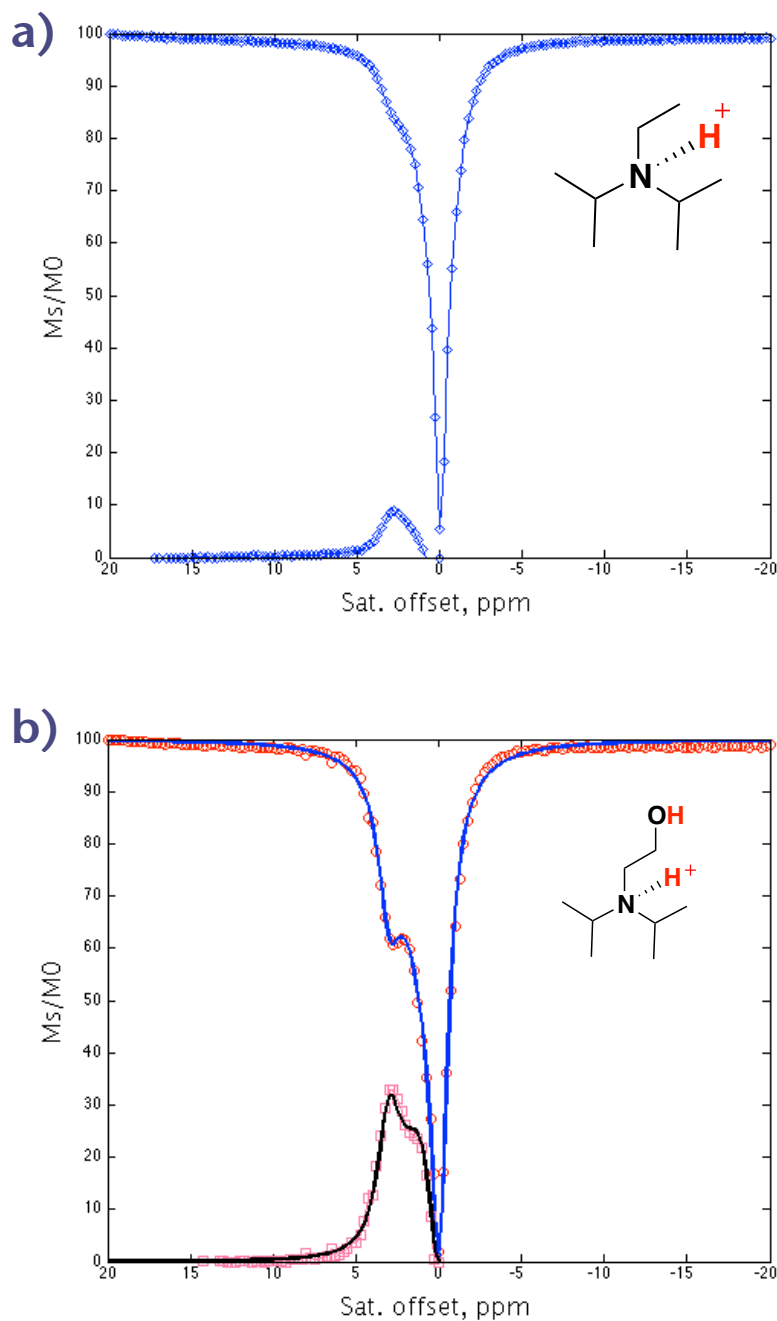

**Figure S5.** The CEST spectra of small analog molecules: a) 116 mM *N,N*-diisopropylethylamine (DIPEA) in 0.1 M MES at pH 5.3 and b) 116 mM *N,N*-diisopropylaminoethanol (DIPAE) in 0.1 M MOPS at pH 5.8, respectively. The CEST asymmetries were also presented to better visualize the CEST effects (namely,  $CEST_{asym} = [M_s/M_0]_{\text{downfield}} - [M_s/M_0]_{\text{upfield}}$ ).

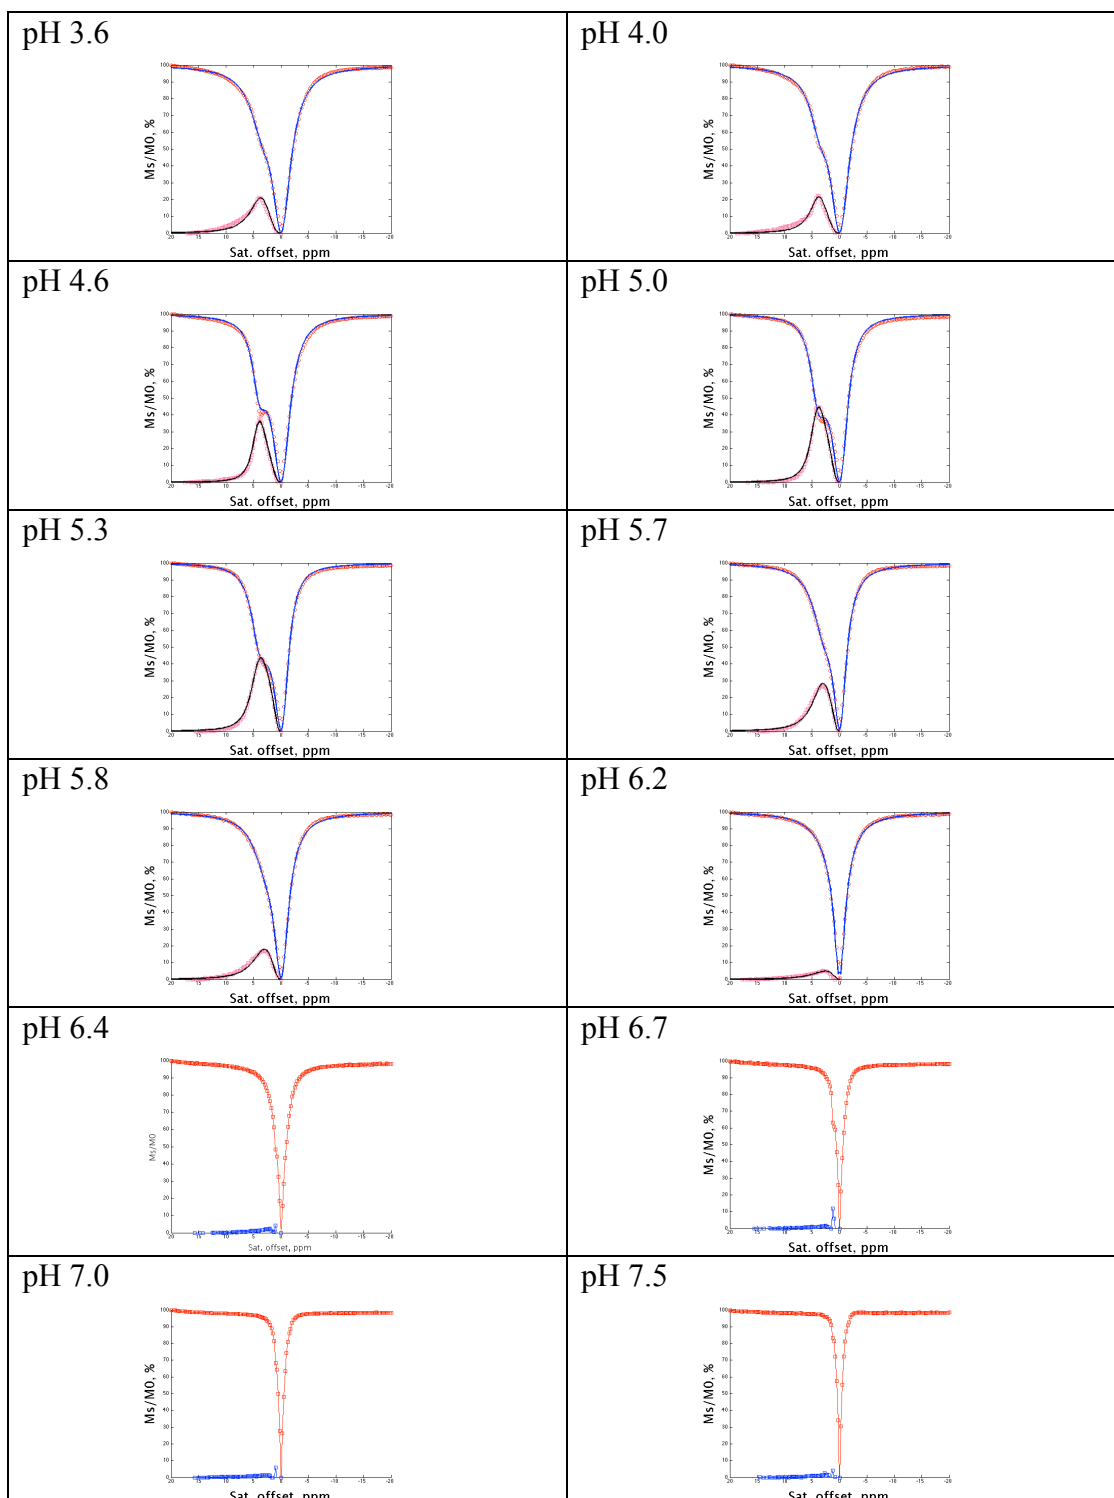

**Figure S6.** The CEST spectra of 0.5 mM PEG<sub>114</sub>-b-PDPA<sub>116</sub> in 0.1 M MES and/or MOPS at the different pH values as labeled in the figures. The CEST asymmetries were also presented to better visualize the CEST effects (namely,  $CEST_{asym} = [M_s/M_0]_{\text{downfield}} - [M_s/M_0]_{\text{upfield}}$ ).

**11) References:**

1. K. Zhou, Y. Wang, X. Huang, K. Luby-Phelps, B. D. Sumer and J. Gao, *Angewandte Chemie International Edition*, 2011, **50**, 6109-6114.
2. N. Nasongkla, E. Bey, J. Ren, H. Ai, C. Khemtong, J. S. Guthi, S.-F. Chin, A. D. Sherry, D. A. Boothman and J. Gao, *Nano Letters*, 2006, **6**, 2427-2430.
3. D. E. Woessner, S. Zhang, M. E. Merritt and A. D. Sherry, *Magnetic Resonance in Medicine*, 2005, **53**, 790-799.
